# Supplementary material for: Human Milk Oligosaccharides, Growth, and Body Composition in Very Preterm Infants
Source: MDPI journal article supplement (doi:10.3390/nu16081200), 2024-04-18
Supplement: s1 [file s1]

**Supplemental Table S1.** Repeated measures correlations between HMO concentrations at Time 1 and Time 2 in very preterm infants fed predominantly maternal milk during NICU hospitalization

| HMO Exposure          | Rho   | p-value |
|-----------------------|-------|---------|
| Primary Analyses      |       |         |
| 2'FL                  | -0.41 | <0.001  |
| 3FL                   | 0.65  | <0.001  |
| 3'SL                  | -0.09 | 0.40    |
| 6'SL                  | -0.72 | <0.001  |
| LNnT                  | -0.36 | <0.001  |
| DSLNT                 | -0.51 | <0.001  |
| Total HMO             | -0.66 | <0.001  |
| Exploratory Analyses  |       |         |
| DFlac                 | -0.01 | 0.90    |
| LNT                   | -0.42 | <0.001  |
| LNFPi                 | -0.58 | <0.001  |
| LNFPii                | 0.04  | 0.71    |
| LNFPiii               | -0.44 | <0.001  |
| LSTb                  | -0.13 | 0.24    |
| LSTc                  | -0.72 | <0.001  |
| DFLNT                 | -0.15 | 0.16    |
| LNH                   | -0.66 | <0.001  |
| FLNH                  | -0.62 | <0.001  |
| DFLNH                 | -0.57 | <0.001  |
| FDSLNH                | -0.36 | <0.001  |
| DSLNH                 | -0.53 | <0.001  |
| Diversity             | -0.43 | <0.001  |
| HMO-bound sialic acid | -0.74 | <0.001  |
| HMO-bound fucose      | -0.37 | <0.001  |
| Total sialylated      | -0.75 | <0.001  |
| Total fucosylated     | -0.49 | <0.001  |

Data represent repeated measures correlation coefficients (and corresponding p-values) between HMO concentrations measured at Time 1 and Time 2.

**Supplemental Table S2.** Medians and interquartile ranges by tertiles for HMO exposures among n = 82 very preterm infants fed predominantly maternal milk

| HMO Exposure          | Low<br>(n=27-28)* | Intermediate<br>(n=26-28)* | High<br>(n=27-28)*   |
|-----------------------|-------------------|----------------------------|----------------------|
| Primary Analyses      |                   |                            |                      |
| 2'FL                  | 44 (28, 596)      | 2066 (1781, 2196)          | 2980 (2680, 3473)    |
| 3FL                   | 166 (81, 233)     | 518 (432, 575)             | 1080 (842, 1550)     |
| 3'SL                  | 116 (102, 127)    | 165 (158, 178)             | 243 (212, 345)       |
| 6'SL                  | 285 (241, 297)    | 409 (378, 453)             | 629 (577, 757)       |
| LNnT                  | 77 (43, 92)       | 138 (113, 148)             | 234 (215, 303)       |
| DSLNT                 | 106 (77, 129)     | 192 (178, 221)             | 362 (326, 461)       |
| Total HMO             | 6936 (6280, 7299) | 8296 (8195, 8631)          | 10564 (9693, 11216)  |
| Exploratory Analyses  |                   |                            |                      |
| DFlac                 | 4 (3-61)          | 152 (132, 171)             | 246 (214, 351)       |
| LNT                   | 430 (304, 541)    | 796 (694, 1034)            | 1441 (1310, 1822)    |
| LNFPi                 | 190 (140, 233)    | 656 (480, 749)             | 1276 (1100, 1846)    |
| LNFPii                | 297 (189, 358)    | 535 (462, 634)             | 1049 (842, 1627)     |
| LNFPiii               | 13 (8, 16)        | 27 (22, 29)                | 42 (39, 70)          |
| LSTb                  | 57 (42, 67)       | 83 (79, 95)                | 150 (122, 176)       |
| LSTc                  | 126 (94, 142)     | 235 (216, 266)             | 407 (370, 496)       |
| DFLNT                 | 55 (14, 190)      | 584 (461, 652)             | 1029 (589, 1439)     |
| LNH                   | 73 (59, 95)       | 123 (108, 133)             | 185 (172, 213)       |
| FLNH                  | 226 (198, 252)    | 336 (316, 361)             | 479 (425, 551)       |
| DFLNH                 | 207 (151, 227)    | 311 (284, 324)             | 435 (387, 530)       |
| FDSLNH                | 125 (103, 146)    | 224 (205, 246)             | 433 (330, 606)       |
| DSLNH                 | 132 (78, 152)     | 269 (235, 321)             | 516 (390, 595)       |
| Diversity             | 3.5 (3.0, 4.0)    | 5.0 (4.9, 5.3)             | 6.9 (6.2, 7.5)       |
| HMO-bound sialic acid | 1653 (1475, 1824) | 2324 (2059, 2599)          | 3325 (3018, 3693)    |
| HMO-bound fucose      | 6755 (5784, 7815) | 9419 (8981, 9811)          | 12708 (11376, 14032) |
| Total sialylated      | 1260 (1114, 1348) | 1669 (1546, 1951)          | 2535 (2256, 2846)    |
| Total fucosylated     | 4589 (4180, 4780) | 5568 (5253, 5725)          | 7458 (6569, 7800)    |

Data are represented as medians and interquartile ranges for HMO exposures operationalized as the mean concentration of the Time 1 and Time 2 measurements by infant. Individual, total sialylated, total fucosylated, and overall total HMOs were measured in µg/mL. HMO-bound sialic acid and fucose were measured in nmol/mL. \*Numbers of participants in HMO-specific tertiles differ slightly due to ties.
